# Supplementary material for: Role of major histocompatibility complex class II in the development of autoimmune type 1 diabetes and thyroiditis in rats
Source: PubMed Central journal article supplement — Genes Immun. 2011 Sep 15;13(2):139–45. doi: 10.1038/gene.2011.63 (PMC3308136; doi:10.1038/gene.2011.63), 2011-09-15
Supplement: gene201163x1.pdf [file gene201163x1.pdf]

## Supplementary Table 1

Genetic profile of the KDP.PVG-*RT1<sup>a/u</sup>* and PVG.KDP-*Cblb* congenic strains

| Chr | Locus              | cM <sup>a</sup> | Chr: Position (bp) <sup>b</sup> | Genotype <sup>c</sup>             |                      |
|-----|--------------------|-----------------|---------------------------------|-----------------------------------|----------------------|
|     |                    |                 |                                 | KDP.PVG- <i>RT1<sup>a/u</sup></i> | PVG.KDP- <i>Cblb</i> |
| 1   | <i>D1Rat1</i>      | 8.9             | 1:10615276-10615404             | KDP                               | PVG.R23              |
| 1   | <i>D1Rat258</i>    | 30.4            | ND                              | KDP                               | PVG.R23              |
| 1   | <i>D1Rat51</i>     | 81.1            | 1:159782446-159782631           | KDP                               | PVG.R23              |
| 1   | <i>D1Rat290</i>    | 103.2           | 1:195105753-195105954           | KDP                               | PVG.R23              |
| 1   | <i>D1Rat90</i>     | 154.5           | 1:267110926-267111087           | KDP                               | PVG.R23              |
| 2   | <i>D2Rat10</i>     | 16.8            | 2:35874554-35874746             | KDP                               | PVG.R23              |
| 2   | <i>D2Rat118</i>    | 84.5            | 2:214988989-214989202           | KDP                               | PVG.R23              |
| 2   | <i>D2Rat185</i>    | 103.2           | 2:238139979-238140155           | KDP                               | PVG.R23              |
| 3   | <i>D3Rat82</i>     | 13.4            | 3:29749287-29749474             | KDP                               | PVG.R23              |
| 3   | <i>D3Rat169</i>    | 48.1            | ND                              | KDP                               | PVG.R23              |
| 3   | <i>D3Rat147</i>    | 65.6            | 3:143492509-143492676           | KDP                               | PVG.R23              |
| 3   | <i>D3Rat137</i>    | 85.5            | 3:163335008-163335184           | KDP                               | PVG.R23              |
| 4   | <i>D4Rat143</i>    | 4.2             | ND                              | KDP                               | PVG.R23              |
| 4   | <i>D4Rat128</i>    | 45.6            | ND                              | KDP                               | PVG.R23              |
| 4   | <i>D4Rat66</i>     | 92.1            | 4:161023443-161023565           | KDP                               | PVG.R23              |
| 5   | <i>D5Rat121</i>    | 4.4             | 5:9396685-9396878               | KDP                               | PVG.R23              |
| 5   | <i>D5Rat70</i>     | 20.9            | 5:36386127-36386391             | KDP                               | PVG.R23              |
| 5   | <i>D5Rat154</i>    | 60.6            | ND                              | KDP                               | PVG.R23              |
| 6   | <i>D6Rat105</i>    | 23.2            | 6:18615952-18616170             | KDP                               | PVG.R23              |
| 6   | <i>D6Rat130</i>    | 48.8            | ND                              | KDP                               | PVG.R23              |
| 6   | <i>D6Rat79</i>     | 87.5            | 6:131029752-131029973           | KDP                               | PVG.R23              |
| 7   | <i>D7Rat32</i>     | 11.1            | 7:21790656-21790795             | KDP                               | PVG.R23              |
| 7   | <i>D7Rat102</i>    | 63.2            | ND                              | KDP                               | PVG.R23              |
| 7   | <i>D7Rat94</i>     | 91.9            | 7:142816043-142816152           | KDP                               | PVG.R23              |
| 8   | <i>D8Rat49</i>     | 23.9            | ND                              | KDP                               | PVG.R23              |
| 8   | <i>D8Rat71</i>     | 89.9            | 8:127907014-127907265           | KDP                               | PVG.R23              |
| 9   | <i>D9Rat44</i>     | 3.8             | 9:2948883-2949051               | KDP                               | PVG.R23              |
| 9   | <i>D9Rat13</i>     | 46.7            | 9:62957528-62957638             | KDP                               | PVG.R23              |
| 9   | <i>D9Rat4</i>      | 62.3            | 9:90696863-90697021             | KDP                               | PVG.R23              |
| 10  | <i>D10Rat51</i>    | 11.7            | ND                              | KDP                               | PVG.R23              |
| 10  | <i>D10Rat98</i>    | 53.1            | 10:70191315-70191541            | KDP                               | PVG.R23              |
| 11  | <i>D11Rat21</i>    | 6.2             | 11:25035084-25035273            | KDP                               | PVG.R23              |
| 11  | <i>D11Rat26</i>    | 7.7             | 11:27193145-27193293            | KDP                               | PVG.R23              |
| 11  | <i>D11Rat18</i>    | ND              | 11:29928014-29928167            | KDP                               | PVG.R23              |
| 11  | <i>D11Rat13</i>    | 10.8            | 11:31820215-31820348            | KDP                               | PVG.R23              |
| 11  | <i>D11Rat68</i>    | 24.6            | 11:46793415-46793584            | KDP                               | PVG.R23              |
| 11  | <i>D11M16Mit46</i> | 26.1            | ND                              | KDP                               | KDP/PVG              |
| 11  | <i>D11Yok1</i>     | 27.6            | ND                              | KDP                               | KDP/PVG              |
| 11  | <i>Cblb</i>        | 29.1            | 11:49690402-49856762            | KDP                               | KDP/PVG              |
| 11  | <i>D11M16Mit14</i> | 30.6            | ND                              | KDP                               | KDP/PVG              |
| 11  | <i>D11Rat34</i>    | ND              | 11:63814024-63814155            | KDP                               | KDP/PVG              |
| 11  | <i>D11Rat37</i>    | ND              | 11:74026445-74026604            | KDP                               | PVG.R23              |
| 11  | <i>D11Rat50</i>    | ND              | 11:84840964-84841212            | KDP                               | PVG.R23              |
| 12  | <i>D12Rat5</i>     | 19.2            | ND                              | KDP                               | PVG.R23              |
| 12  | <i>D12Rat79</i>    | 44              | 12:36223812-36224036            | KDP                               | PVG.R23              |
| 13  | <i>D13Rat1</i>     | 0               | 13:10555731-10556042            | KDP                               | PVG.R23              |
| 13  | <i>D13Rat111</i>   | 4.4             | 13:32030140-32030259            | KDP                               | PVG.R23              |
| 13  | <i>D13Rat32</i>    | 30.9            | 13:78189257-78189364            | KDP                               | PVG.R23              |
| 14  | <i>D14Rat10</i>    | 22.3            | 14:33157433-33157602            | KDP                               | PVG.R23              |
| 14  | <i>D14Rat37</i>    | 44.4            | 14:81448327-81448566            | KDP                               | PVG.R23              |
| 14  | <i>D14Rat22</i>    | 68.4            | 14:102509228-102509397          | KDP                               | PVG.R23              |

**Supplementary Table 1**  
Continued

| Chr | Locus            | cM <sup>a</sup> | Chr: Position (bp) <sup>b</sup> | Genotype <sup>c</sup>              |                      |
|-----|------------------|-----------------|---------------------------------|------------------------------------|----------------------|
|     |                  |                 |                                 | KDP.PVG- <i>RT1</i> <sup>a/u</sup> | PVG.KDP- <i>Cblb</i> |
| 15  | <i>D15Rat54</i>  | 10.1            | 15:14072030-14072252            | KDP                                | PVG.R23              |
| 15  | <i>D15Rat123</i> | 37.9            | 15:58412002-58412138            | KDP                                | PVG.R23              |
| 15  | <i>D15Rat106</i> | 69.3            | 15:106177704-106177917          | KDP                                | PVG.R23              |
| 16  | <i>D16Rat12</i>  | 4               | 16:350122-350232                | KDP                                | PVG.R23              |
| 16  | <i>D16Rat67</i>  | 21.6            | 16:50115924-50116143            | KDP                                | PVG.R23              |
| 16  | <i>D16Rat28</i>  | 27              | 16:60211076-60211297            | KDP                                | PVG.R23              |
| 17  | <i>D17Rat117</i> | 15.8            | 17:31007409-31007601            | KDP                                | PVG.R23              |
| 17  | <i>D17Rat47</i>  | 45.5            | ND                              | KDP                                | PVG.R23              |
| 18  | <i>D18Rat29</i>  | 4.9             | 18:13904418-13904577            | KDP                                | PVG.R23              |
| 18  | <i>D18Arb3</i>   | 25.3            | 18:58175228-58175596            | KDP                                | PVG.R23              |
| 18  | <i>D18Rat44</i>  | 53.2            | 18:86863207-86863412            | KDP                                | PVG.R23              |
| 19  | <i>D19Rat34</i>  | 2.2             | 19:2265038-2265293              | KDP                                | PVG.R23              |
| 19  | <i>D19Rat82</i>  | 7.8             | 19:12290643-12290775            | KDP                                | PVG.R23              |
| 19  | <i>D19Rat96</i>  | 17.7            | ND                              | KDP                                | PVG.R23              |
| 19  | <i>D19Rat68</i>  | 29.3            | ND                              | KDP                                | PVG.R23              |
| 19  | <i>D19Rat67</i>  | 35.9            | ND                              | KDP                                | PVG.R23              |
| 20  | <i>D20Rat46</i>  | 1               | 20:3040047-3040188              | KDP/PVG                            | PVG.R23              |
| 20  | <i>RT1-Db</i>    | ND              | 20:4671513-4681035              | KDP/PVG                            | PVG.R23              |
| 20  | <i>RT1-Bb</i>    | ND              | 20:4730560-4736186              | KDP/PVG                            | PVG.R23              |
| 20  | <i>D20Rat48</i>  | 5.7             | ND                              | KDP/PVG                            | PVG.R23              |
| 20  | <i>D20Rat31</i>  | 11.5            | 20:10410005-10410227            | KDP/PVG                            | PVG.R23              |
| 20  | <i>D20Rat60</i>  | ND              | 20:14605697-14605852            | KDP                                | PVG.R23              |
| X   | <i>DXRat8</i>    | 6.7             | X:41386879-41387039             | KDP                                | PVG.R23              |
| X   | <i>DXRat104</i>  | 44.4            | X:143448612-143448759           | KDP                                | PVG.R23              |

Abbreviations: Chr, chromosome; cM, centiMorgan; bp, base pair; ND, not determined.

<sup>a</sup>Distances (in cM) were based on the genetic map for chromosome 11<sup>22</sup> or on the Genome-Wide Screening Set (Invitrogen, Carlsbad, CA) for other chromosomes.

<sup>b</sup>Positions (in bp) were based on the RGSC 3.4 assembly (Ensembl Genome Browser, <http://www.ensembl.org/index.html>).

<sup>c</sup>KDP, homozygous for the KDP allele; PVG.R23, homozygous for the PVG.R23 allele; KDP/PVG, heterozygous for the KDP and PVG.R23 alleles.

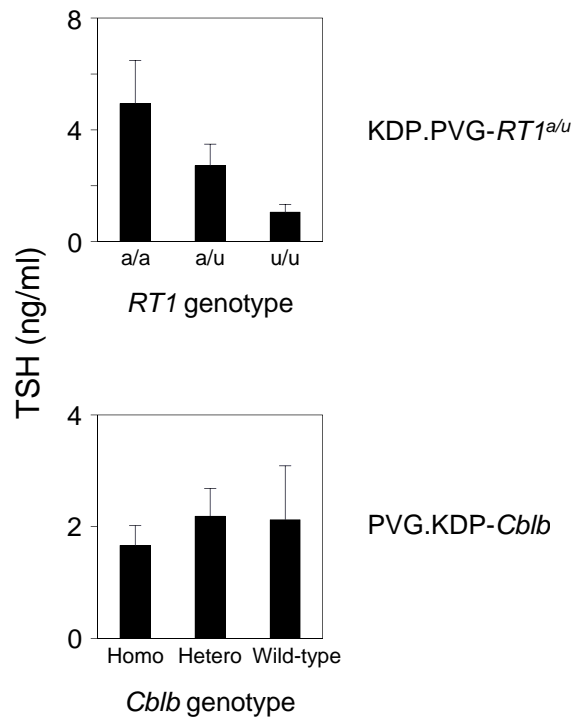

### Supplementary Figure 1

The serum TSH values (mean  $\pm$  S.E.) in the KDP.PVG-RT1<sup>a/u</sup> and PVG.KDP-Cblb congenic strains.

Data were obtained from the a/a homozygous (n = 6), a/u heterozygous (n = 15) and u/u homozygous (n = 6) animals in the KDP.PVG-RT1<sup>a/u</sup> congenic strain, all of which harbor the homozygous *Cblb* mutation, and from the animals homozygous (n = 15), heterozygous (n = 5), and wild-type (n = 4) for the *Cblb* mutation in the PVG.KDP-Cblb congenic strain. There is no statistical difference among three genotypes in both congenic strains by Tukey-Kramer method. There was one *Cblb* homozygous mutant animal in the PVG.KDP-Cblb congenic strain exhibiting an exceptionally high TSH value of more than 200 ng/ml that was excluded from the figure as an outlier.
